# Supplementary material for: The role of geomorphic zonation in long-term changes in coral-community structure on a Caribbean fringing reef
Source: PeerJ. 2020 Oct 22;8:e10103. doi: 10.7717/peerj.10103 (PMC7585725; doi:10.7717/peerj.10103)
Supplement: Supplemental Information 4 — The results of Index Value Importance (IVI) for coral species (Spp.) calculated as described in Methods for 1985 and 2019 (Year) and Zone ( RF: Reef front or accretionary zone, HG: Coral hard ground or non-accretionary zone ) and temporal classes (Tempo): RF and HG before the 1990s, represented by the 1985 year, and RF and HG in 2019. [file peerj-08-10103-s004.xlsx]

## Sheet: Data S3 IVI
Zone	Year	Tempo	Spp.	IVI
CG	1985	HG_1985	M. annularis complex	23.97
RF	2019	RF_2019	Porites astreoides	23.37
RF	1985	RF_1985	Porites astreoides	19.55
CG	1985	HG_1985	Montastraea cavernosa	18.71
RF	1985	RF_1985	Agaricia tenuifolia	15.32
CG	2019	HG_2019	Agaricia agaricites	14.59
RF	2019	RF_2019	Acropora prolifera	13.52
RF	2019	RF_2019	Acropora palmata	13.39
CG	2019	HG_2019	Colpophyllia natans	13.24
RF	1985	RF_1985	Acropora palmata	11.12
RF	1985	RF_1985	Siderastrea radians	10.67
RF	1985	RF_1985	Agaricia fragilis	9.93
RF	1985	RF_1985	Solenastrea bournoni	9.84
RF	1985	RF_1985	Agaricia agaricites	9.44
CG	2019	HG_2019	Siderastrea siderea	9.27
CG	2019	HG_2019	Porites astreoides	8.94
CG	1985	HG_1985	Porites astreoides	8.58
RF	2019	RF_2019	Agaricia agaricites	8.44
RF	2019	RF_2019	Siderastrea siderea	8.14
CG	2019	HG_2019	Montastraea cavernosa	7.86
CG	1985	HG_1985	Pseudodiploria clivosa	7.53
CG	1985	HG_1985	Agaricia agaricites	6.6
CG	2019	HG_2019	Porites porites	6.53
RF	1985	RF_1985	M. annularis complex	6.09
RF	2019	RF_2019	Agaricia tenuifolia	6.05
CG	2019	HG_2019	Pseudodiploria strigosa	6
RF	2019	RF_2019	Porites porites	5.77
RF	1985	RF_1985	Siderastrea siderea	5.49
CG	1985	HG_1985	Dichocoenia stokesii	5.25
CG	1985	HG_1985	Diploria labyrinthiformis	5.18
CG	1985	HG_1985	Acropora cervicornis	4.87
CG	1985	HG_1985	Siderastrea siderea	4.2
CG	2019	HG_2019	Diploria labyrinthiformis	3.66
CG	2019	HG_2019	Stephanocoenia intersepta	3.6
RF	2019	RF_2019	Stephanocoenia intersepta	3.3
CG	1985	HG_1985	Pseudodiploria strigosa	3.26
CG	1985	HG_1985	Meandrina meandrites	3.2
CG	2019	HG_2019	Agaricia tenuifolia	3.19
CG	2019	HG_2019	Meandrina meandrites	2.84
CG	1985	HG_1985	Porites porites	2.78
RF	2019	RF_2019	Pseudodiploria strigosa	2.64
RF	1985	RF_1985	Isophyllia rigida	2.56
RF	2019	RF_2019	Acropora cervicornis	2.51
CG	2019	HG_2019	Acropora cervicornis	2.38
CG	2019	HG_2019	Porites furcata	2.3
CG	1985	HG_1985	Dendrogira cylindrus	1.84
RF	2019	RF_2019	Agaricia lamarcki	1.65
CG	2019	HG_2019	Dichocoenia stokesii	1.45
RF	2019	RF_2019	Siderastrea radians	1.45
RF	2019	RF_2019	Porites furcata	1.44
CG	1985	HG_1985	Isophyllia rigida	1.37
CG	2019	HG_2019	Helioseris cucullata	1.36
CG	1985	HG_1985	Stephanocoenia intersepta	1.34
CG	1985	HG_1985	Siderastrea radians	1.33
RF	2019	RF_2019	Colpophyllia natans	1.25
CG	2019	HG_2019	Isophyllia rigida	1.2
RF	2019	RF_2019	Montastraea cavernosa	1.16
RF	2019	RF_2019	Agaricia fragilis	1.12
CG	2019	HG_2019	Agaricia fragilis	0.98
CG	2019	HG_2019	Mycetophyllia lamarckiana	0.89
CG	2019	HG_2019	M. annularis complex	8.1
RF	2019	RF_2019	Dichocoenia stokesii	0.77
CG	2019	HG_2019	Solenastrea bournoni	0.73
RF	2019	RF_2019	Agaricia lamarcki	0.68
RF	2019	RF_2019	Meandrina meandrites	0.68
RF	2019	RF_2019	Porites divaricata	0.66
RF	2019	RF_2019	Solenastrea bournoni	0.61
RF	2019	RF_2019	Favia fragum	0.58
CG	2019	HG_2019	Porites divaricata	0.46
CG	2019	HG_2019	Siderastrea radians	0.43
RF	2019	RF_2019	M. annularis complex	0.83
